# Supplementary material for: An association between membranoproliferative glomerulonephritis and metastatic colorectal carcinoma: a case report
Source: Springer Nature journal article supplement (doi:10.1186/s13256-016-0979-3), 2016-07-20
Supplement: MOESM1 [file 10505540]

| Lab No<br>Specimen Type  | 681362775<br>Urine<br>? Collection | 681367680<br>Urine<br>24h Collection | 701440726<br>Urine | 701560656<br>Urine<br>? Collection | 701565101<br>Urine<br>24h Collection | Units       | Ref Range    |
|--------------------------|------------------------------------|--------------------------------------|--------------------|------------------------------------|--------------------------------------|-------------|--------------|
| <b>Concentrations</b>    |                                    |                                      |                    |                                    |                                      |             |              |
| Creatinine               | 8.9                                | 6.8                                  | 6.6                | 5.0                                | 6.6                                  | mmol/L      |              |
| Protein                  | <b>1300</b>                        | <b>11000</b>                         | <b>6500</b>        | <b>2200</b>                        | <b>1800</b>                          | mg/L        | (< 100)      |
| <b>Timed Excretion</b>   |                                    |                                      |                    |                                    |                                      |             |              |
| Time Period              |                                    | 24.0                                 |                    |                                    | 24.0                                 | h           |              |
| Volume                   |                                    | 2.196                                |                    |                                    | 1.956                                | L           |              |
| Creatinine               |                                    | 14.9                                 |                    |                                    | 12.9                                 | mmol/24h    | (8.0 - 18.0) |
| Protein                  |                                    | <b>24000</b>                         |                    |                                    | <b>3500</b>                          | mg/24h      | (< 150)      |
| <b>Creatinine Ratios</b> |                                    |                                      |                    |                                    |                                      |             |              |
| Protein                  | <b>146</b>                         | <b>1600</b>                          | <b>985</b>         | <b>440</b>                         | <b>269</b>                           | g/mol creat | (< 15)       |
